# Supplementary material for: Immunogenicity, Effectiveness, and Safety of COVID-19 Vaccines among Patients with Immune-Mediated Dermatological Diseases: A Systematic Review and Meta-analysis
Source: PubMed Central journal article supplement — Acta Derm Venereol. 2024 May 2;104:40009. doi: 10.2340/actadv.v104.40009 (PMC11094464; doi:10.2340/actadv.v104.40009), 2024-05-02

**Fig. S1. The PRISMA flow diagram of the study**

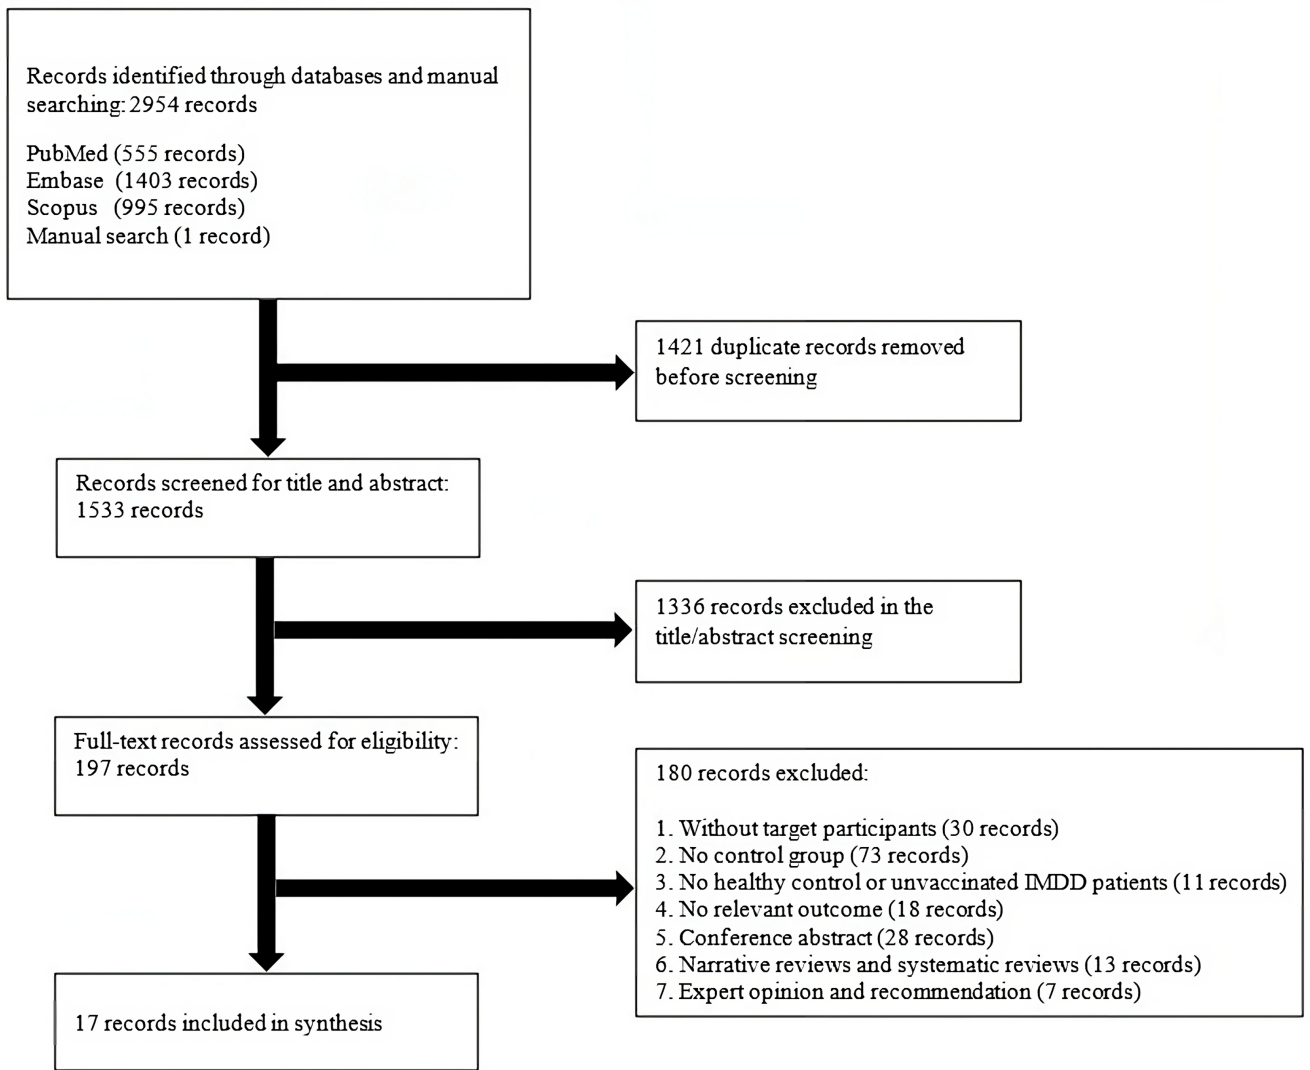

**Fig. S2. Funnel plots and contour-enhanced funnel plots for meta-analyses of the seroconversion (a), anti-SARS-CoV-2 IgG antibody (b), breakthrough COVID-19 infection (c), and adverse events (d) outcomes in vaccinated IMDD patients compared with vaccinated HCs**

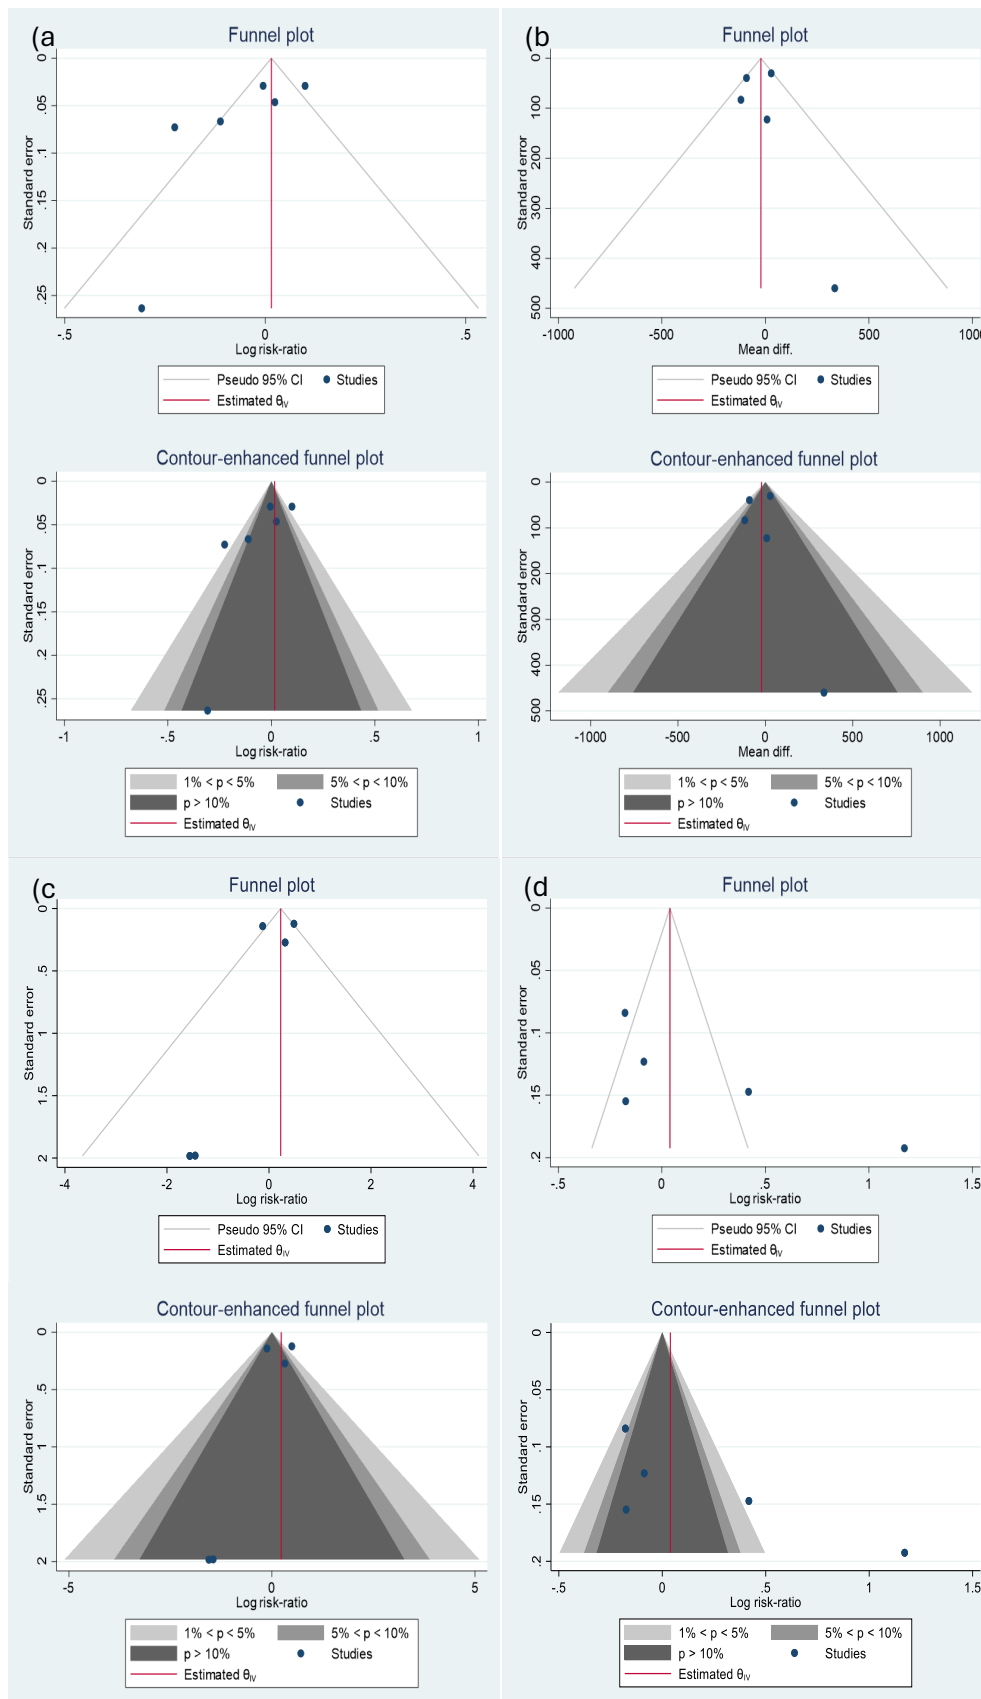

**Fig. S3. Funnel plot and contour-enhanced funnel plot for meta-analysis of the breakthrough COVID-19 infection outcome in vaccinated IMDD patients compared with unvaccinated IMDD patients**

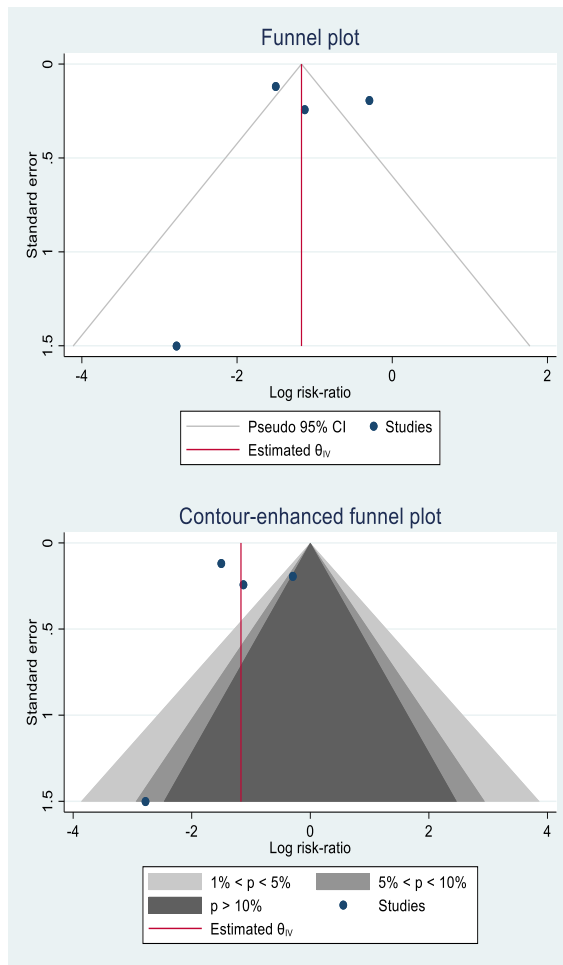

Supplement: ActaDV-104-40009-s1.pdf [file ActaDV-104-40009-s1.pdf]
