# Supplementary material for: Immunogenicity, Effectiveness, and Safety of COVID-19 Vaccines among Patients with Immune-Mediated Dermatological Diseases: A Systematic Review and Meta-analysis
Source: PubMed Central journal article supplement — Acta Derm Venereol. 2024 May 2;104:40009. doi: 10.2340/actadv.v104.40009 (PMC11094464; doi:10.2340/actadv.v104.40009), 2024-05-02
Supplement: ActaDV-104-40009-s2.pdf [file ActaDV-104-40009-s2.pdf]

Supplementary material has been published as submitted. It has not been copyedited, or typeset by Acta Dermato-Venereologica

**Table SI. Search strategy**

| Database | Search terms                                                                                                                                                                                                                                                                                                                                                                                                                                                                                                                                                                                                                                                                                                                                                                                                                                                                                                                                                                                                                                                                   |
|----------|--------------------------------------------------------------------------------------------------------------------------------------------------------------------------------------------------------------------------------------------------------------------------------------------------------------------------------------------------------------------------------------------------------------------------------------------------------------------------------------------------------------------------------------------------------------------------------------------------------------------------------------------------------------------------------------------------------------------------------------------------------------------------------------------------------------------------------------------------------------------------------------------------------------------------------------------------------------------------------------------------------------------------------------------------------------------------------|
| PubMed   | (((covid-19 OR sars-cov-2) AND vaccin*) OR sars-cov-2 vaccine) AND (pemphig* OR duhring disease OR epidermolysis bullosa acquisita OR linear iga OR iga dermatosis OR iga dermat* OR autoimmune bullous disease OR autoimmune blistering disease OR psoria* OR urticaria OR urticar* OR atopic eczema OR ((dermatitis OR dermat*) AND atopic) OR lupus erythematosus)                                                                                                                                                                                                                                                                                                                                                                                                                                                                                                                                                                                                                                                                                                          |
| Scopus   | TITLE-ABS-KEY (((("sars-cov-2" OR "covid-19") AND "vaccin*") AND ("pemphig*" OR "duhring disease" OR "dermatitis herpetiformis" OR "epidermolysis bullosa acquisita" OR "linear iga" OR "iga dermat*" OR "autoimmune bullous disease" OR "autoimmune blistering disease" OR "psoria*" OR "urticar*" OR "atopic dermat*" OR "atopic eczema" OR "lupus"))                                                                                                                                                                                                                                                                                                                                                                                                                                                                                                                                                                                                                                                                                                                        |
| Embase   | (('coronavirus disease 2019'/exp OR 'coronavirus disease 2019' OR 'covid 19'/exp OR 'covid 19' OR 'sars cov 2'/exp OR 'sars cov 2') AND ('vaccine'/exp OR vaccine OR vaccin*) OR 'sars-cov-2 vaccine'/exp OR 'sars-cov-2 vaccine') AND ('pemphigus'/exp OR pemphigus OR 'pemphigoid'/exp OR pemphigoid OR pemphig* OR 'dermatitis herpetiformis'/exp OR 'dermatitis herpetiformis' OR 'epidermolysis bullosa acquisita'/exp OR 'epidermolysis bullosa acquisita' OR 'linear iga bullous dermatosis'/exp OR 'linear iga bullous dermatosis' OR 'adult linear iga disease'/exp OR 'adult linear iga disease' OR 'linear iga' OR (linear AND ('iga'/exp OR iga)) OR (('iga'/exp OR iga) AND dermat*) OR 'autoimmune bullous disease'/exp OR 'autoimmune bullous disease' OR 'autoimmune blistering disease'/exp OR 'autoimmune blistering disease' OR 'psoriasis'/exp OR psoriasis OR 'urticaria'/exp OR urticaria OR urticar* OR 'atopic dermatitis'/exp OR 'atopic dermatitis' OR 'atopic eczema'/exp OR 'atopic eczema' OR 'lupus erythematosus'/exp OR 'lupus erythematosus') |

**Table SII. Conversion factors for the BAU/mL unit recommended by the WHO international standard for anti-SARS-CoV-2 immunoglobulin**

| Manufacturers       | Unit  | Conversion factors |
|---------------------|-------|--------------------|
| Abbott (US)         | AU/ml | 0.142              |
| LIAISON (Italy)     | AU/ml | 2.6                |
| Roche (Switzerland) | U/ml  | 1.029              |

BAU: binding antibody units; AU: arbitrary units; U: units

**Table SIII. Risk of bias assessment with the Newcastle-Ottawa scale**

| First author (year)  | Selection (Question 1-4) | Comparability (Question 5) | Outcomes (Question 6-8) | Total score | Quality rating |
|----------------------|--------------------------|----------------------------|-------------------------|-------------|----------------|
| Boekel (2022)        | 3                        | 0                          | 3                       | 6           | Moderate       |
| Stalman (2022)       | 3                        | 0                          | 2                       | 5           | Moderate       |
| Cao (2022)           | 2                        | 0                          | 2                       | 4           | High           |
| Chanprapaph (2022)   | 4                        | 1                          | 3                       | 8           | Low            |
| Cristaudo (2022)     | 4                        | 2                          | 3                       | 9           | Low            |
| Özgen (2022)         | 4                        | 0                          | 3                       | 7           | Low            |
| Mahil (2021) (27)    | 4                        | 0                          | 3                       | 7           | Low            |
| Mahil (2021) (28)    | 4                        | 0                          | 3                       | 7           | Low            |
| Megna (2022)         | 3                        | 1                          | 3                       | 7           | Low            |
| Pakhchanian (2022)   | 4                        | 0                          | 4                       | 8           | Low            |
| Parlotsky (2022)     | 3                        | 0                          | 3                       | 6           | Moderate       |
| Piros (2022)         | 4                        | 1                          | 3                       | 8           | Low            |
| Seree-aphinan (2021) | 4                        | 1                          | 3                       | 8           | Low            |
